# Supplementary material for: Study protocol: Collaboration Oriented Approach to Controlling High blood pressure (COACH) in adults – a randomised controlled trial
Source: PubMed Central journal article supplement — BMJ Open. 2024 Jul 8;14(7):e085898. doi: 10.1136/bmjopen-2024-085898 (PMC11256044; doi:10.1136/bmjopen-2024-085898), 2024-07-08
Supplement: bmjopen-2024-085898.reviewer_comments.pdf [file bmjopen-2024-085898.reviewer_comments.pdf]

## PEER REVIEW HISTORY

BMJ Open publishes all reviews undertaken for accepted manuscripts. Reviewers are asked to complete a checklist review form (<http://bmjopen.bmj.com/site/about/resources/checklist.pdf>) and are provided with free text boxes to elaborate on their assessment. These free text comments are reproduced below.

## ARTICLE DETAILS

|                            |                                                                                                                                                                                                                                                                                                                                                                                                         |
|----------------------------|---------------------------------------------------------------------------------------------------------------------------------------------------------------------------------------------------------------------------------------------------------------------------------------------------------------------------------------------------------------------------------------------------------|
| <b>TITLE (PROVISIONAL)</b> | Study Protocol: Collaboration Oriented Approach to Controlling High blood pressure (COACH) in adults - A Randomized Controlled Trial                                                                                                                                                                                                                                                                    |
| <b>AUTHORS</b>             | Dorr, David; Montgomery, Emma; Ghumman, Aisha; Michaels, LeAnn; Rolbiecki, Abigail; Canfield, Shannon; Shaffer, Victoria; Johnson, Blake; Lockwood, Melinda; Ghosh, Parijat; Martinez, William; Consortium, COACH; Young, Emma; Yates, Amy; Bobo, Michelle; Casey, Donald; Soffer, Jonathan; Del Fiol, Guilherme; Putnam, Katherine; Paul, James; Storer, Matthew; Markwardt, Sheila; Koopman, Richelle |

This article was not externally reviewed at BMJ Open. Protocols that have been independently assessed prior to submission to BMJ Open are usually fast-tracked to publication on the grounds that further substantial changes will not be possible. This independent assessment will usually be external, independent review for both a substantial grant award from a non-commercial or government funder and ethics approval.
